# Supplementary material for: Inhibiting stromal Class I HDACs curbs pancreatic cancer progression
Source: PubMed Central journal article supplement (PMC10700526; doi:10.1038/s41467-023-42178-6), 2023-12-06
Supplement: 41467_2023_42178_MOESM3_ESM.pdf [file 41467_2023_42178_MOESM3_ESM.pdf]

## **Description of Additional Supplementary Files**

Supplementary Data 1: Top 25 TF candidates that potentially regulate activation-induced and Ent-repressed genes in PSCs, and the expression of these TFs in PSC samples.

Supplementary Data 2: Lists of genes transcriptionally regulated in PSC activation and functionally related to myofibroblast identity, proliferation and lipid metabolism.

Supplementary Data 3: Top 25 enriched genes in fibroblast subpopulations identified by scRNA-seq.

Supplementary Data 4: Sequences of primers used in RT-qPCR.
